# Supplementary material for: Real-time two- and three-dimensional imaging of monocyte motility and navigation on planar surfaces and in collagen matrices: roles of Rho
Source: PubMed Central journal article supplement (PMC4848558; doi:10.1038/srep25016), 2016-04-28
Supplement: srep25016-s1.pdf [file srep25016-s1.pdf]

# Real-time two- and three-dimensional imaging of monocyte motility and navigation on planar surfaces and in collagen matrices: roles of Rho

Robert Bzymek<sup>1</sup>, Markus Horsthemke<sup>2</sup>, Katrin Isfort<sup>1</sup>, Simon Mohr<sup>1</sup>, Kerstin Tjaden<sup>3</sup>, Carsten Müller-Tidow<sup>4</sup>, Marlies Unterberg<sup>5</sup>, Tanja Schwerdtle<sup>6</sup>, Martin Bähler<sup>2</sup>, Albrecht Schwab<sup>1</sup> & Peter J. Hanley<sup>2</sup>

## Legends for supplementary videos

**Supplementary video 1.** Human monocyte-specific real-time 2D chemotaxis assay. The monocytes seen migrating in a chemotactic fMLP gradient were pre-labeled with fluorescent (Alexa Fluor 488-conjugated) anti-CD14 antibodies. The time-lapse images are 400 x 600  $\mu\text{m}$  and cover a time span of 4 h (60 frames are shown at a rate of 10 frames per second).

**Supplementary video 2.** Time-lapse 3D reconstructed images, acquired by spinning disk confocal microscopy, of human monocytes migrating on a 2D surface. Image stacks (14 z-slices with 1.12  $\mu\text{m}$  steps) were captured at a rate of 12 timepoints/min via a Nikon 60x (numerical aperture, 1.49) oil-immersion objective lens. The recording represents 20 min. The orientation arrows show x, -y and -z.

**Supplementary video 3.** Time-lapse (extended focus) images of human monocytes migrating on a 2D surface. Image stacks (14 z-slices with 1.45  $\mu\text{m}$  steps) were captured at a rate of 12 timepoints/min, and the recording represents 20 min.

**Supplementary video 4.** Time-lapse 3D reconstructed images, acquired by spinning disk confocal microscopy, of human monocytes migrating on a 2D surface. Image stacks (14 z-slices with 1.45  $\mu\text{m}$  steps) were captured at a rate of 12 timepoints/min, and the recording represents 20 min. The orientation arrows show x, -y and -z.

**Supplementary video 5.** 3D reconstructed images, rotated 360° on the x-axis, of human monocytes migrating on a 2D surface. The orientation arrows show x, -y and -z.

**Supplementary video 6.** Human monocyte-specific real-time 3D chemotaxis assay using a low density collagen (0.8 mg/ml) matrix. The monocytes seen migrating in a chemotactic fMLP gradient were pre-labeled with fluorescent (Alexa Fluor 488-conjugated) anti-CD14 antibodies. The time-lapse images are 400 x 600  $\mu\text{m}$  and cover a time span of 4 h (60 frames are shown at a rate of 10 frames per second).

**Supplementary video 7.** 3D reconstruction of TAT-C3 (50  $\mu\text{g/ml}$ ; Rho inhibitor) treated human monocytes (labeled with Alexa Fluor 488-conjugated anti-CD14 antibodies) migrating in a low density collagen (0.8 mg/ml) matrix. The image was acquired by spinning disk confocal microscopy, using a Nikon 60x (numerical aperture, 1.49) oil-immersion objective lens and 67 z-slices (0.5  $\mu\text{m}$  step size). The orientation arrows show x, -y and -z.

**Supplementary video 8.** 3D reconstruction of human monocytes (labeled with Alexa Fluor 488-conjugated anti-CD14 antibodies) migrating in a low density collagen (0.8 mg/ml) matrix. The image was acquired by spinning disk confocal microscopy, using a Nikon 60x (numerical aperture, 1.49) oil-immersion objective lens and 23 z-slices (1  $\mu\text{m}$  step size). The orientation arrows show x, -y and -z.

**Supplementary video 9.** Time-lapse (extended focus) images of a Y-27632 (30  $\mu\text{M}$ ; Rho kinase inhibitor) treated human monocyte (labeled with Alexa Fluor 488-conjugated anti-CD14 antibodies) migrating in a low density collagen (0.8 mg/ml) matrix. Images (17 z-slices at 1  $\mu\text{m}$  step size) were acquired at a rate of 0.5 timepoints/min and the movie represents a recording time of 26 min.

**Supplementary video 10.** 3D reconstruction of a Y-27632 (30  $\mu\text{M}$ ) treated human monocyte (labeled with Alexa Fluor 488-conjugated anti-CD14 antibodies) migrating in a low density collagen (0.8 mg/ml) matrix. The image was acquired by spinning disk confocal microscopy, using a Nikon 60x (numerical aperture, 1.49) oil-immersion objective lens and 17 z-slices (1  $\mu\text{m}$  step size). The orientation arrows show x, -y and -z.

**Supplementary video 11.** 3D reconstruction of a Y-27632 (30  $\mu\text{M}$ ) treated human monocyte (labeled with Alexa Fluor 488-conjugated anti-CD14 antibodies) migrating in a low density collagen (0.8 mg/ml) matrix. The image was acquired by spinning disk confocal microscopy, using a Nikon 60x (numerical aperture, 1.49) oil-immersion objective lens and 17 z-slices (1  $\mu\text{m}$  step size). The orientation arrows show x, -y and -z.

**Supplementary video 12.** 3D reconstruction of a Y-27632 (30  $\mu\text{M}$ ) treated human monocyte (labeled with Alexa Fluor 488-conjugated anti-CD14 antibodies) migrating in a low density collagen (0.8 mg/ml) matrix. The image was acquired by spinning disk confocal microscopy, using a Nikon 60x (numerical aperture, 1.49) oil-immersion objective lens and 17 z-slices (1  $\mu\text{m}$  step size). The orientation arrows show x, -y and -z.

**Supplementary video 13.** Time-lapse (extended focus) images of a human monocyte (labeled with Alexa Fluor 488-conjugated anti-CD14 antibodies) migrating in a high density collagen (2.4 mg/ml) matrix. Image stacks (42 z-slices at 1  $\mu\text{m}$  step size) were acquired by spinning disk confocal microscopy at a rate of 0.5 timepoints/min. The movie represents a recording time of 30 min.

**Supplementary video 14.** 3D reconstructions of human monocytes (labeled with Alexa Fluor 488-conjugated anti-CD14 antibodies) migrating in a high density collagen (2.4 mg/ml) matrix. The image

was acquired by spinning disk confocal microscopy, using a Nikon 60x (numerical aperture, 1.49) oil-immersion objective lens and 42 z-slices (1  $\mu\text{m}$  step size). The orientation arrows show x, -y and -z.

**Supplementary video 15.** 3D reconstructions of Y-27632 (30  $\mu\text{M}$ ) treated human monocytes (labeled with Alexa Fluor 488-conjugated anti-CD14 antibodies) migrating in a high density collagen (2.4 mg/ml) matrix. The image was acquired by spinning disk confocal microscopy, using a Nikon 60x (numerical aperture, 1.49) oil-immersion objective lens and 44 z-slices (1  $\mu\text{m}$  step size). The orientation arrows show x, -y and -z.
